# Supplementary material for: Role of the Mn substituent in Na3V2(PO4)3 for high-rate sodium storage
Source: Royal Society of Chemistry journal article supplement (doi:10.1039/c8ta06162a), 2018-01-01
Supplement: c8ta06162a1.pdf [file c8ta06162a1.pdf]

### ***Supplementary Information***

for Journal of Materials Chemistry A, DOI: 10.1039/((please add manuscript number))

#### **Role of Mn substituent in $\text{Na}_3\text{V}_2(\text{PO}_4)_3$ for high-rate sodium storage**

Jae-Sang Park, Jongsoon Kim, Jae Hyeon Jo, and Seung-Taek Myung\*

*Department of Nano Technology and Advanced Materials Engineering & Sejong Battery  
Institute, Sejong University, Gunja-dong, Gwangjin-gu, Seoul 05006, South Korea*

---

\*Corresponding author

E-mail: [smyung@sejong.ac.kr](mailto:smyung@sejong.ac.kr) (S. Myung)

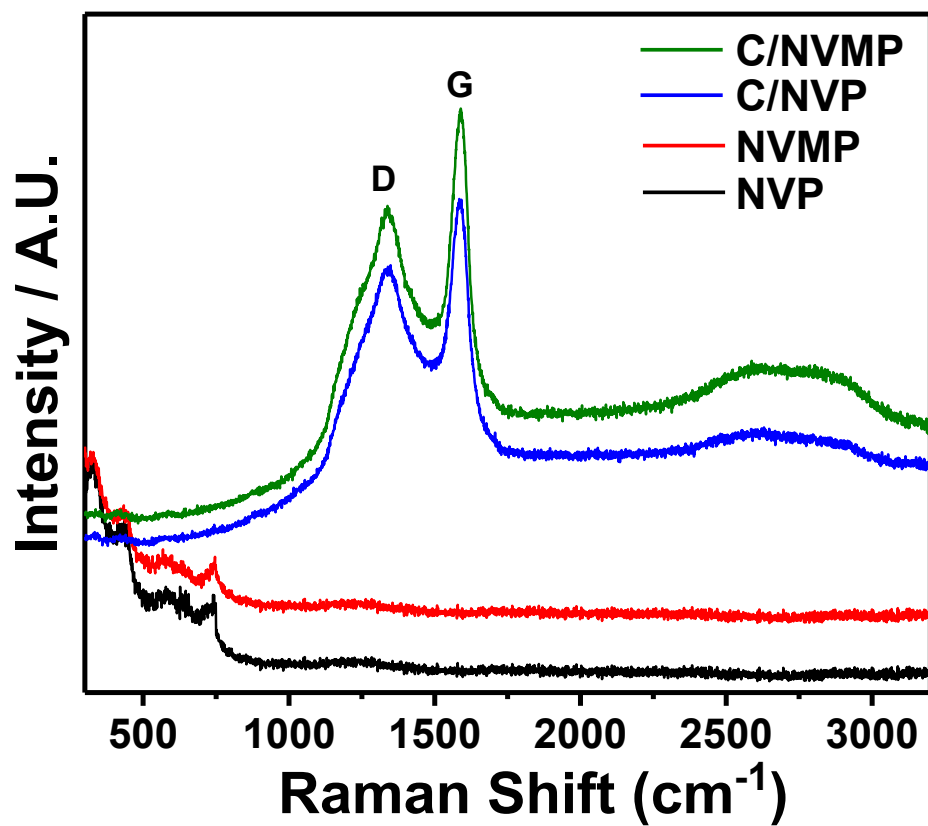

Fig. S1. Raman spectra of NVP, NVMP, C/NVP, and C/NVMP.

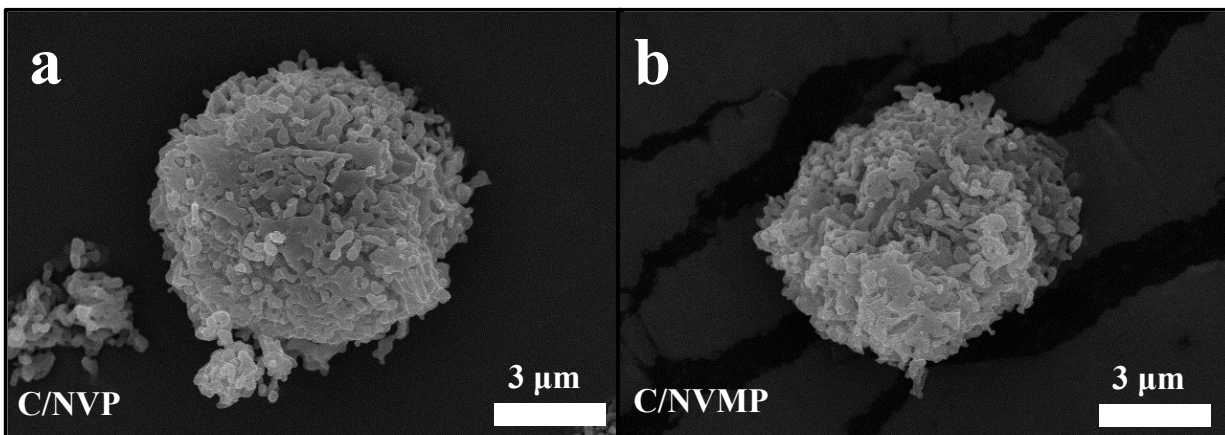

**Fig. S2.** SEM images of as-synthesized (a) C/NVP and (b) C/NVMP powders.

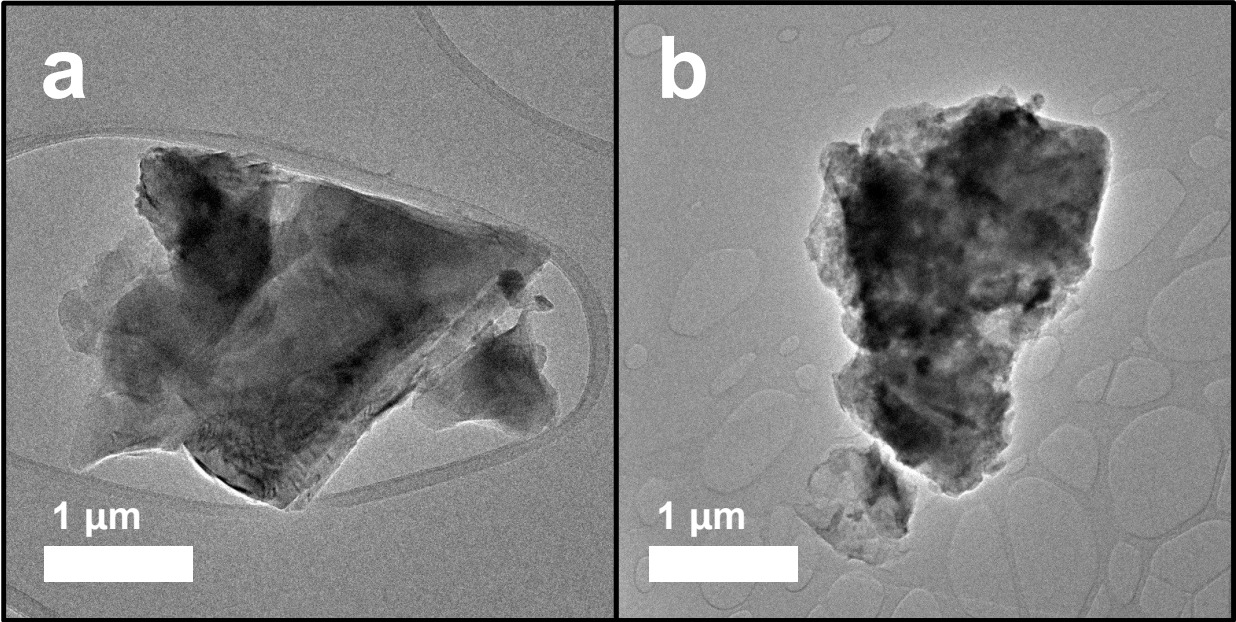

**Fig. S3.** TEM images of as-synthesized (a) NVP and (b) NVMP observed at low magnification.

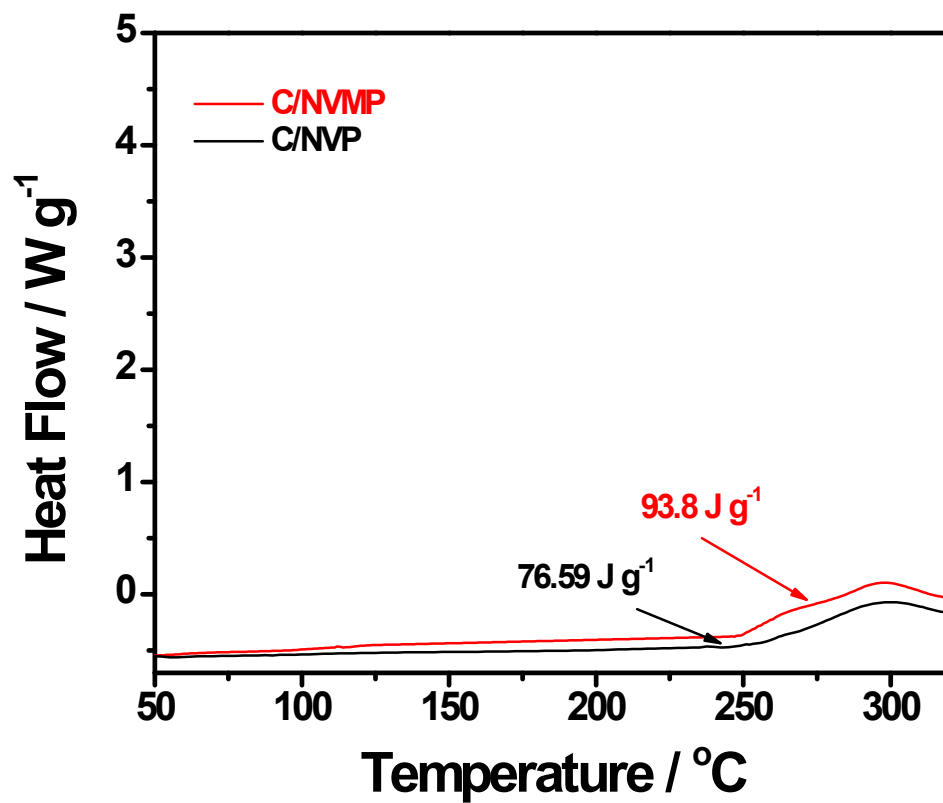

Fig. S4. DSC curves of fully desodiated (a) C/NVP and (b) C/NVMP electrodes.

**Table S1** Rietveld refinement results of XRD data for NVP, NVMP, C/NVP, and C/NVMP.

| Crystal system  |              | Rhombohedral  |            |            |            |
|-----------------|--------------|---------------|------------|------------|------------|
| Space group     |              | <i>R -3 C</i> |            |            |            |
|                 |              | NVP           | NVMP       | C/NVP      | C/NVMP     |
| Cell Parameters | <i>a</i> / Å | 8.7277(4)     | 8.7427(3)  | 8.7296(1)  | 8.7429(1)  |
|                 | <i>b</i> / Å | 8.7277(4)     | 8.7427(3)  | 8.7296(1)  | 8.7429(1)  |
|                 | <i>c</i> / Å | 21.8154(5)    | 21.7953(1) | 21.8188(6) | 21.7970(5) |
| Rp / %          |              | 8.44          | 9.95       | 8.46       | 9.75       |
| <i>R</i> wp / % |              | 11.1          | 14.0       | 11.2       | 13.5       |

**Table S2** Rietveld refinement results of XRD data for extensively cycled NVP, NVMP, C/NVP, and C/NVMP.

| Crystal system      |         | Rhombohedral  |            |            |            |
|---------------------|---------|---------------|------------|------------|------------|
| Space group         |         | <i>R -3 C</i> |            |            |            |
|                     |         | NVP           | NVMP       | C/NVP      | C/NVMP     |
| a / Å               | Phase 1 | 8.7193(4)     | 8.7376(4)  | 8.7208(9)  | 8.7366(5)  |
|                     | Phase 2 | 8.4262(8)     | 8.4874(1)  | 8.4551(3)  | 8.4882(8)  |
| b / Å               | Phase 1 | 8.7193(4)     | 8.7376(4)  | 8.7208(9)  | 8.7366(5)  |
|                     | Phase 2 | 8.4262(8)     | 8.4874(1)  | 8.4551(3)  | 8.4882(8)  |
| c / Å               | Phase 1 | 21.7972(5)    | 21.7915(3) | 21.8050(3) | 21.7916(7) |
|                     | Phase 2 | 21.4794(5)    | 21.4855(7) | 21.5964(5) | 21.5063(6) |
| R <sub>p</sub> / %  |         | 13.7          | 13.9       | 14.2       | 14.5       |
| R <sub>wp</sub> / % |         | 13.3          | 13.6       | 13.9       | 14.2       |

Phase 1: Na<sub>3</sub>[V<sub>2-x</sub>Mn<sub>x</sub>](PO<sub>4</sub>)<sub>3</sub> phase (x = 0, 0.1).

Phase 2 : Na<sub>3-d</sub>[V<sub>2-x</sub>Mn<sub>x</sub>](PO<sub>4</sub>)<sub>3</sub> phase (x = 0, 0.1) (Na-deficient phase).
